# Supplementary material for: Regulation of MicroRNAs, and the Correlations of MicroRNAs and Their Targeted Genes by Zinc Oxide Nanoparticles in Ovarian Granulosa Cells
Source: PLoS One. 2016 May 19;11(5):e0155865. doi: 10.1371/journal.pone.0155865 (PMC4873213; doi:10.1371/journal.pone.0155865)
Supplement: S4 Table — (XLS) [file pone.0155865.s005.xls]

## Sheet: profile_total
pairwise	miR-name	Ctrl-std	ZnO_NP-5-std	fold-change(log2 ZnO_NP-5/Ctrl)	p-value	sig-lable		pairwise	miR-name	Ctrl-std	ZnSO4-10-std	fold-change(log2 ZnSO4-10/Ctrl)	p-value	sig-lable		pairwise	miR-name	ZnSO4-10-std	ZnO_NP-5-std	fold-change(log2 ZnO_NP-5/ZnSO4-10)	p-value	sig-lable
Ctrl-ZnO_NP-5	gga-let-7a-2-3p	8.187	3.7585	-1.12318	0.000126969	**		Ctrl-ZnSO4-10	gga-let-7a-2-3p	8.187	4.4795	-0.869997	0.001559			ZnSO4-10-ZnO_NP-5	gga-let-7a-2-3p	4.4795	3.7585	-0.253181	0.455896
Ctrl-ZnO_NP-5	gga-let-7a-5p	134199	100480	-0.417462	0			Ctrl-ZnSO4-10	gga-let-7a-5p	134199	198824	0.567121	0			ZnSO4-10-ZnO_NP-5	gga-let-7a-5p	198824	100480	-0.984582	0
Ctrl-ZnO_NP-5	gga-let-7b	51277.6	34647.8	-0.565564	0			Ctrl-ZnSO4-10	gga-let-7b	51277.6	59238	0.208195	0			ZnSO4-10-ZnO_NP-5	gga-let-7b	59238	34647.8	-0.773759	0
Ctrl-ZnO_NP-5	gga-let-7c-5p	25130.8	20697.1	-0.280027	0			Ctrl-ZnSO4-10	gga-let-7c-5p	25130.8	46026.2	0.872998	0			ZnSO4-10-ZnO_NP-5	gga-let-7c-5p	46026.2	20697.1	-1.15302	0	**
Ctrl-ZnO_NP-5	gga-let-7d	686.813	645.326	-0.0898894	0.000722333			Ctrl-ZnSO4-10	gga-let-7d	686.813	746.789	0.120784	1.68088e-06			ZnSO4-10-ZnO_NP-5	gga-let-7d	746.789	645.326	-0.210673	2.64103e-16
Ctrl-ZnO_NP-5	gga-let-7f-5p	88417.7	69394	-0.349525	0			Ctrl-ZnSO4-10	gga-let-7f-5p	88417.7	130396	0.560491	0			ZnSO4-10-ZnO_NP-5	gga-let-7f-5p	130396	69394	-0.910016	0
Ctrl-ZnO_NP-5	gga-let-7g-5p	6236.05	4734.25	-0.397496	0			Ctrl-ZnSO4-10	gga-let-7g-5p	6236.05	7131.94	0.193662	2.19117e-121			ZnSO4-10-ZnO_NP-5	gga-let-7g-5p	7131.94	4734.25	-0.591157	0
Ctrl-ZnO_NP-5	gga-let-7i	1331.57	1110.24	-0.262252	1.55057e-40			Ctrl-ZnSO4-10	gga-let-7i	1331.57	1030.6	-0.36965	1.67729e-78			ZnSO4-10-ZnO_NP-5	gga-let-7i	1030.6	1110.24	0.107398	2.15326e-07
Ctrl-ZnO_NP-5	gga-let-7j-3p	3.9253	9.5671	1.28528	3.84733e-06	**		Ctrl-ZnSO4-10	gga-let-7j-3p	3.9253	3.6262	-0.114344	0.741118			ZnSO4-10-ZnO_NP-5	gga-let-7j-3p	3.6262	9.5671	1.39962	5.55434e-07	**
Ctrl-ZnO_NP-5	gga-let-7j-5p	133917	100306	-0.416931	0			Ctrl-ZnSO4-10	gga-let-7j-5p	133917	198437	0.567337	0			ZnSO4-10-ZnO_NP-5	gga-let-7j-5p	198437	100306	-0.984267	0
Ctrl-ZnO_NP-5	gga-let-7k-5p	601.466	542.821	-0.148007	2.50656e-07			Ctrl-ZnSO4-10	gga-let-7k-3p	0.4486	1.0665	1.24938	0.143283			ZnSO4-10-ZnO_NP-5	gga-let-7k-3p	1.0665	0.3417	-1.64208	0.0753691
Ctrl-ZnO_NP-5	gga-miR-100-5p	1455.38	1251.13	-0.218168	1.56746e-31			Ctrl-ZnSO4-10	gga-let-7k-5p	601.466	1138.53	0.920615	0			ZnSO4-10-ZnO_NP-5	gga-let-7k-5p	1138.53	542.821	-1.06862	0	**
Ctrl-ZnO_NP-5	gga-miR-101-3p	132.338	99.4299	-0.412479	1.21517e-10			Ctrl-ZnSO4-10	gga-miR-100-5p	1455.38	1147.06	-0.343458	7.82624e-75			ZnSO4-10-ZnO_NP-5	gga-miR-100-5p	1147.06	1251.13	0.12529	1.53211e-10
Ctrl-ZnO_NP-5	gga-miR-103-3p	14179.5	13419.7	-0.0794496	3.81338e-42			Ctrl-ZnSO4-10	gga-miR-101-3p	132.338	109.427	-0.274266	8.21082e-06			ZnSO4-10-ZnO_NP-5	gga-miR-101-3p	109.427	99.4299	-0.138213	0.0374089
Ctrl-ZnO_NP-5	gga-miR-106-3p	22.4302	16.2869	-0.46173	0.00331644			Ctrl-ZnSO4-10	gga-miR-103-3p	14179.5	13453.5	-0.0758218	8.12515e-40			ZnSO4-10-ZnO_NP-5	gga-miR-103-3p	13453.5	13419.7	-0.00362777	0.534881
Ctrl-ZnO_NP-5	gga-miR-106-5p	40.5987	46.0134	0.180621	0.0835641			Ctrl-ZnSO4-10	gga-miR-106-3p	22.4302	18.9844	-0.240628	0.105324			ZnSO4-10-ZnO_NP-5	gga-miR-106-3p	18.9844	16.2869	-0.221102	0.172911
Ctrl-ZnO_NP-5	gga-miR-107-3p	6504.87	6221.71	-0.0642094	8.25725e-14			Ctrl-ZnSO4-10	gga-miR-106-5p	40.5987	33.4893	-0.277733	0.0124467			ZnSO4-10-ZnO_NP-5	gga-miR-106-5p	33.4893	46.0134	0.458354	2.23057e-05
Ctrl-ZnO_NP-5	gga-miR-10a-5p	2.8038	0.5695	-2.29962	0.000226494	**		Ctrl-ZnSO4-10	gga-miR-107-3p	6504.87	5581.72	-0.220811	2.0984e-142			ZnSO4-10-ZnO_NP-5	gga-miR-107-3p	5581.72	6221.71	0.156601	1.76201e-70
Ctrl-ZnO_NP-5	gga-miR-10b-5p	3.2524	1.0251	-1.66574	0.00125782	**		Ctrl-ZnSO4-10	gga-miR-10a-5p	2.8038	2.1331	-0.394432	0.363991			ZnSO4-10-ZnO_NP-5	gga-miR-10a-5p	2.1331	0.5695	-1.90518	0.00423167	**
Ctrl-ZnO_NP-5	gga-miR-122-5p	31.5144	22.7789	-0.468313	0.000417794			Ctrl-ZnSO4-10	gga-miR-10b-5p	3.2524	0.2133	-3.93055	1.20278e-07	**		ZnSO4-10-ZnO_NP-5	gga-miR-10b-5p	0.2133	1.0251	2.26481	0.0291395	*
Ctrl-ZnO_NP-5	gga-miR-124a-3p	1.5701	0.6834	-1.20005	0.0845281			Ctrl-ZnSO4-10	gga-miR-122-5p	31.5144	37.6488	0.256593	0.0259273			ZnSO4-10-ZnO_NP-5	gga-miR-122-5p	37.6488	22.7789	-0.724906	7.73421e-09
Ctrl-ZnO_NP-5	gga-miR-125b-3p	3.2524	3.5307	0.11845	0.751836			Ctrl-ZnSO4-10	gga-miR-124a-3p	1.5701	0.6399	-1.29494	0.0607215			ZnSO4-10-ZnO_NP-5	gga-miR-125b-3p	3.8395	3.5307	-0.120964	0.738205
Ctrl-ZnO_NP-5	gga-miR-125b-5p	3768.39	3528.11	-0.0950526	5.88955e-17			Ctrl-ZnSO4-10	gga-miR-125b-3p	3.2524	3.8395	0.239414	0.511403			ZnSO4-10-ZnO_NP-5	gga-miR-125b-5p	2912.18	3528.11	0.276795	1.75298e-118
Ctrl-ZnO_NP-5	gga-miR-126-3p	1.3458	0.1139	-3.56262	0.00200986	**		Ctrl-ZnSO4-10	gga-miR-125b-5p	3768.39	2912.18	-0.371848	5.74805e-221			ZnSO4-10-ZnO_NP-5	gga-miR-126-5p	1.7065	1.7084	0.00160539	0.991316
Ctrl-ZnO_NP-5	gga-miR-126-5p	3.4767	1.7084	-1.02507	0.0214282	*		Ctrl-ZnSO4-10	gga-miR-126-3p	1.3458	0.7466	-0.850057	0.217881			ZnSO4-10-ZnO_NP-5	gga-miR-128-1-5p	0.8532	3.4168	2.00169	0.000132775	**
Ctrl-ZnO_NP-5	gga-miR-128-1-5p	3.3645	3.4168	0.0222537	0.951769			Ctrl-ZnSO4-10	gga-miR-126-5p	3.4767	1.7065	-1.02668	0.018621	*		ZnSO4-10-ZnO_NP-5	gga-miR-128-2-5p	41.1683	19.5898	-1.07143	4.44177e-17	**
Ctrl-ZnO_NP-5	gga-miR-128-2-5p	24.6732	19.5898	-0.332842	0.0231472			Ctrl-ZnSO4-10	gga-miR-128-1-5p	3.3645	0.8532	-1.97944	0.000160621	**		ZnSO4-10-ZnO_NP-5	gga-miR-128-3p	11316.2	9949.93	-0.185628	4.11502e-175
Ctrl-ZnO_NP-5	gga-miR-128-3p	12832	9949.93	-0.366986	0			Ctrl-ZnSO4-10	gga-miR-128-2-5p	24.6732	41.1683	0.738589	7.05289e-10			ZnSO4-10-ZnO_NP-5	gga-miR-1306-3p	73.3778	60.2502	-0.284378	0.000631275
Ctrl-ZnO_NP-5	gga-miR-1306-3p	39.9258	60.2502	0.593645	1.36843e-09			Ctrl-ZnSO4-10	gga-miR-128-3p	12832	11316.2	-0.181358	2.23858e-191			ZnSO4-10-ZnO_NP-5	gga-miR-1306-5p	24.4237	23.9178	-0.0301971	0.828435
Ctrl-ZnO_NP-5	gga-miR-1306-5p	9.7571	23.9178	1.29356	1.807e-13	**		Ctrl-ZnSO4-10	gga-miR-1306-3p	39.9258	73.3778	0.878022	1.24613e-21			ZnSO4-10-ZnO_NP-5	gga-miR-130a-3p	196.883	281.205	0.514287	2.18732e-31
Ctrl-ZnO_NP-5	gga-miR-130a-3p	336.565	281.205	-0.259262	3.40187e-11			Ctrl-ZnSO4-10	gga-miR-1306-5p	9.7571	24.4237	1.32376	1.616e-14	**		ZnSO4-10-ZnO_NP-5	gga-miR-130a-5p	6.9325	5.4669	-0.342653	0.213727
Ctrl-ZnO_NP-5	gga-miR-130a-5p	8.5235	5.4669	-0.640723	0.0152106			Ctrl-ZnSO4-10	gga-miR-130a-3p	336.565	196.883	-0.773549	1.08703e-75			ZnSO4-10-ZnO_NP-5	gga-miR-130b-3p	600.354	926.873	0.626558	4.4273e-141
Ctrl-ZnO_NP-5	gga-miR-130b-3p	926.928	926.873	-8.638e-05	0.997005			Ctrl-ZnSO4-10	gga-miR-130a-5p	8.5235	6.9325	-0.29807	0.221375			ZnSO4-10-ZnO_NP-5	gga-miR-130b-5p	12.2652	13.5534	0.144084	0.444385
Ctrl-ZnO_NP-5	gga-miR-130b-5p	16.8227	13.5534	-0.311754	0.0781717			Ctrl-ZnSO4-10	gga-miR-130b-3p	926.928	600.354	-0.626645	3.74872e-142			ZnSO4-10-ZnO_NP-5	gga-miR-130c-3p	97.3749	138.837	0.511773	3.59058e-16
Ctrl-ZnO_NP-5	gga-miR-130c-3p	155.554	138.837	-0.164016	0.0037594			Ctrl-ZnSO4-10	gga-miR-130b-5p	16.8227	12.2652	-0.455839	0.0105228			ZnSO4-10-ZnO_NP-5	gga-miR-130c-5p	2.3464	0.7973	-1.55725	0.00890136	**
Ctrl-ZnO_NP-5	gga-miR-1329-5p	17.3834	10.1366	-0.778136	3.76863e-05			Ctrl-ZnSO4-10	gga-miR-130c-3p	155.554	97.3749	-0.675789	1.02229e-28			ZnSO4-10-ZnO_NP-5	gga-miR-1329-5p	24.957	10.1366	-1.29987	2.57162e-14	**
Ctrl-ZnO_NP-5	gga-miR-133a-3p	3.3645	10.1366	1.59111	2.34996e-08	**		Ctrl-ZnSO4-10	gga-miR-130c-5p	0.4486	2.3464	2.38695	0.000501254	**		ZnSO4-10-ZnO_NP-5	gga-miR-133a-3p	4.5861	10.1366	1.14423	1.06477e-05	**
Ctrl-ZnO_NP-5	gga-miR-133c-3p	0.6729	3.3029	2.29527	5.75869e-05	**		Ctrl-ZnSO4-10	gga-miR-1329-5p	17.3834	24.957	0.521734	0.000433664			ZnSO4-10-ZnO_NP-5	gga-miR-133c-3p	1.5998	3.3029	1.04584	0.0203273	*
Ctrl-ZnO_NP-5	gga-miR-135a-2-3p	1.0094	0.9112	-0.147658	0.840373			Ctrl-ZnSO4-10	gga-miR-133a-3p	3.3645	4.5861	0.446876	0.194581			ZnSO4-10-ZnO_NP-5	gga-miR-135a-2-3p	1.2798	0.9112	-0.490079	0.471494
Ctrl-ZnO_NP-5	gga-miR-138-1-3p	37.6828	85.6486	1.18452	9.61086e-39	**		Ctrl-ZnSO4-10	gga-miR-133c-3p	0.6729	1.5998	1.24943	0.0684898			ZnSO4-10-ZnO_NP-5	gga-miR-138-1-3p	37.9687	85.6486	1.17362	3.05009e-39	**
Ctrl-ZnO_NP-5	gga-miR-138-2-3p	1.6823	4.6697	1.47289	0.000370203	**		Ctrl-ZnSO4-10	gga-miR-135a-2-3p	1.0094	1.2798	0.34242	0.603751			ZnSO4-10-ZnO_NP-5	gga-miR-138-2-3p	1.0665	4.6697	2.13045	3.0272e-06	**
Ctrl-ZnO_NP-5	gga-miR-138-5p	654.402	529.04	-0.3068	2.05007e-27			Ctrl-ZnSO4-10	gga-miR-138-1-3p	37.6828	37.9687	0.0109044	0.921897			ZnSO4-10-ZnO_NP-5	gga-miR-138-5p	283.592	529.04	0.899558	5.1832e-151
Ctrl-ZnO_NP-5	gga-miR-1397-5p	2.4673	3.4168	0.469713	0.247879			Ctrl-ZnSO4-10	gga-miR-138-2-3p	1.6823	1.0665	-0.657551	0.267291			ZnSO4-10-ZnO_NP-5	gga-miR-1397-5p	1.9198	3.4168	0.83169	0.051171
Ctrl-ZnO_NP-5	gga-miR-140-3p	39621.1	36612.6	-0.113926	1.80252e-230			Ctrl-ZnSO4-10	gga-miR-138-5p	654.402	283.592	-1.20636	1.98745e-302	**		ZnSO4-10-ZnO_NP-5	gga-miR-140-3p	34499.9	36612.6	0.0857481	7.35957e-126
Ctrl-ZnO_NP-5	gga-miR-1416-5p	113.945	118.906	0.0614751	0.333579			Ctrl-ZnSO4-10	gga-miR-1397-5p	2.4673	1.9198	-0.361977	0.432064			ZnSO4-10-ZnO_NP-5	gga-miR-1416-5p	112.733	118.906	0.0769092	0.221625
Ctrl-ZnO_NP-5	gga-miR-142-5p	1.2337	0.01	-6.94685	0.000535439	**		Ctrl-ZnSO4-10	gga-miR-140-3p	39621.1	34499.9	-0.199675	0			ZnSO4-10-ZnO_NP-5	gga-miR-1434	9.5988	4.8975	-0.970809	0.000195565
Ctrl-ZnO_NP-5	gga-miR-1434	2.8038	4.8975	0.804662	0.0250411			Ctrl-ZnSO4-10	gga-miR-1416-5p	113.945	112.733	-0.0154341	0.807114			ZnSO4-10-ZnO_NP-5	gga-miR-1451-3p	1.7065	1.4806	-0.204858	0.714808
Ctrl-ZnO_NP-5	gga-miR-1451-3p	2.5795	1.4806	-0.80091	0.108844			Ctrl-ZnSO4-10	gga-miR-142-5p	1.2337	0.32	-1.94685	0.027582	*		ZnSO4-10-ZnO_NP-5	gga-miR-1451-5p	42.7681	64.9198	0.602123	1.07508e-10
Ctrl-ZnO_NP-5	gga-miR-1451-5p	64.8233	64.9198	0.00214609	0.979659			Ctrl-ZnSO4-10	gga-miR-1434	2.8038	9.5988	1.77547	2.74023e-09	**		ZnSO4-10-ZnO_NP-5	gga-miR-1454	4.7994	3.4168	-0.490208	0.150377
Ctrl-ZnO_NP-5	gga-miR-1454	4.3739	3.4168	-0.356274	0.311912			Ctrl-ZnSO4-10	gga-miR-1451-3p	2.5795	1.7065	-0.596051	0.205219			ZnSO4-10-ZnO_NP-5	gga-miR-1456-5p	253.836	256.149	0.0130849	0.757313
Ctrl-ZnO_NP-5	gga-miR-1456-5p	156.675	256.149	0.709206	1.62974e-48			Ctrl-ZnSO4-10	gga-miR-1451-5p	64.8233	42.7681	-0.599977	1.08858e-10			ZnSO4-10-ZnO_NP-5	gga-miR-146a-5p	1.1732	0.9112	-0.364609	0.602575
Ctrl-ZnO_NP-5	gga-miR-146b-5p	131.105	102.163	-0.359841	1.69056e-08			Ctrl-ZnSO4-10	gga-miR-1454	4.3739	4.7994	0.133934	0.675809			ZnSO4-10-ZnO_NP-5	gga-miR-146b-5p	163.607	102.163	-0.679356	5.07519e-30
Ctrl-ZnO_NP-5	gga-miR-146c-3p	3.2524	2.8474	-0.19186	0.630284			Ctrl-ZnSO4-10	gga-miR-1456-5p	156.675	253.836	0.696121	5.84314e-48			ZnSO4-10-ZnO_NP-5	gga-miR-146c-3p	5.6526	2.8474	-0.989269	0.00382861
Ctrl-ZnO_NP-5	gga-miR-146c-5p	288.789	249.543	-0.210729	4.84352e-07			Ctrl-ZnSO4-10	gga-miR-146a-5p	0.5608	1.1732	1.06489	0.174135			ZnSO4-10-ZnO_NP-5	gga-miR-146c-5p	309.402	249.543	-0.310198	2.42365e-14
Ctrl-ZnO_NP-5	gga-miR-148a-3p	944.761	767.307	-0.300145	2.5394e-37			Ctrl-ZnSO4-10	gga-miR-146b-5p	131.105	163.607	0.319514	1.03244e-08			ZnSO4-10-ZnO_NP-5	gga-miR-148a-3p	876.16	767.307	-0.191391	6.20656e-16
Ctrl-ZnO_NP-5	gga-miR-1550-5p	13.2338	8.4282	-0.650931	0.00211937			Ctrl-ZnSO4-10	gga-miR-146c-3p	3.2524	5.6526	0.79741	0.015407			ZnSO4-10-ZnO_NP-5	gga-miR-1550-5p	14.1849	8.4282	-0.75106	0.000265409
Ctrl-ZnO_NP-5	gga-miR-1551-5p	9.645	8.656	-0.156081	0.493649			Ctrl-ZnSO4-10	gga-miR-146c-5p	288.789	309.402	0.0994691	0.010857			ZnSO4-10-ZnO_NP-5	gga-miR-1551-5p	11.7319	8.656	-0.438664	0.0409605
Ctrl-ZnO_NP-5	gga-miR-1552-3p	1.458	1.1389	-0.35635	0.566789			Ctrl-ZnSO4-10	gga-miR-148a-3p	944.761	876.16	-0.108754	1.16343e-06			ZnSO4-10-ZnO_NP-5	gga-miR-1552-3p	0.4266	1.1389	1.41669	0.0912256
Ctrl-ZnO_NP-5	gga-miR-1552-5p	63.2532	91.3433	0.53016	1.60915e-11			Ctrl-ZnSO4-10	gga-miR-1550-5p	13.2338	14.1849	0.100129	0.585239			ZnSO4-10-ZnO_NP-5	gga-miR-1552-5p	48.4208	91.3433	0.915672	2.52999e-28
Ctrl-ZnO_NP-5	gga-miR-1553-3p	1.3458	1.0251	-0.392699	0.547521			Ctrl-ZnSO4-10	gga-miR-1551-5p	9.645	11.7319	0.282584	0.174238			ZnSO4-10-ZnO_NP-5	gga-miR-1553-3p	3.3063	1.0251	-1.68945	0.000917613	**
Ctrl-ZnO_NP-5	gga-miR-1555-3p	1.2337	1.1389	-0.115351	0.860454			Ctrl-ZnSO4-10	gga-miR-1552-3p	1.458	0.4266	-1.77303	0.0235468	*		ZnSO4-10-ZnO_NP-5	gga-miR-1555-3p	0.9599	1.1389	0.246685	0.710373
Ctrl-ZnO_NP-5	gga-miR-1555-5p	0.3365	1.3667	2.02202	0.0196156	*		Ctrl-ZnSO4-10	gga-miR-1552-5p	63.2532	48.4208	-0.385512	2.13067e-05			ZnSO4-10-ZnO_NP-5	gga-miR-1555-5p	1.8131	1.3667	-0.407762	0.464503
Ctrl-ZnO_NP-5	gga-miR-1559-5p	17.832	12.4145	-0.522442	0.00338688			Ctrl-ZnSO4-10	gga-miR-1553-3p	1.3458	3.3063	1.29675	0.00611606	**		ZnSO4-10-ZnO_NP-5	gga-miR-1559-5p	19.5176	12.4145	-0.652749	0.000152954
Ctrl-ZnO_NP-5	gga-miR-1560-3p	4.7103	4.2141	-0.160594	0.624537			Ctrl-ZnSO4-10	gga-miR-1555-3p	1.2337	0.9599	-0.362036	0.581371			ZnSO4-10-ZnO_NP-5	gga-miR-1560-3p	3.9462	4.2141	0.0947605	0.775378
Ctrl-ZnO_NP-5	gga-miR-1561	2.1309	2.3918	0.166634	0.717777			Ctrl-ZnSO4-10	gga-miR-1555-5p	0.3365	1.8131	2.42978	0.00217552	**		ZnSO4-10-ZnO_NP-5	gga-miR-1561	1.2798	2.3918	0.902178	0.0817489
Ctrl-ZnO_NP-5	gga-miR-1563	25.6826	29.157	0.183051	0.163037			Ctrl-ZnSO4-10	gga-miR-1559-5p	17.832	19.5176	0.130307	0.406184			ZnSO4-10-ZnO_NP-5	gga-miR-1563	27.1967	29.157	0.100411	0.430916
Ctrl-ZnO_NP-5	gga-miR-1564-5p	1.5701	2.6196	0.73849	0.13073			Ctrl-ZnSO4-10	gga-miR-1560-3p	4.7103	3.9462	-0.255355	0.433028			ZnSO4-10-ZnO_NP-5	gga-miR-1564-5p	3.093	2.6196	-0.23966	0.559331
Ctrl-ZnO_NP-5	gga-miR-1589	2.243	1.0251	-1.12966	0.0472772	*		Ctrl-ZnSO4-10	gga-miR-1561	2.1309	1.2798	-0.735545	0.16703			ZnSO4-10-ZnO_NP-5	gga-miR-1574-3p	1.1732	0.5695	-1.04268	0.184456
Ctrl-ZnO_NP-5	gga-miR-15a	69.0851	60.3641	-0.194684	0.0226556			Ctrl-ZnSO4-10	gga-miR-1563	25.6826	27.1967	0.0826404	0.530532			ZnSO4-10-ZnO_NP-5	gga-miR-1589	0.9599	1.0251	0.0948086	0.88468
Ctrl-ZnO_NP-5	gga-miR-15b-5p	607.186	628.583	0.0499661	0.0701949			Ctrl-ZnSO4-10	gga-miR-1564-5p	1.5701	3.093	0.97815	0.0345336			ZnSO4-10-ZnO_NP-5	gga-miR-15a	79.9903	60.3641	-0.406134	6.05252e-07
Ctrl-ZnO_NP-5	gga-miR-15c-5p	108.001	138.154	0.355226	1.04449e-08			Ctrl-ZnSO4-10	gga-miR-1574-3p	0.2243	1.1732	2.38695	0.016692	*		ZnSO4-10-ZnO_NP-5	gga-miR-15b-5p	394.086	628.583	0.673596	2.90063e-109
Ctrl-ZnO_NP-5	gga-miR-1609	9.3085	4.7836	-0.960452	0.000321117			Ctrl-ZnSO4-10	gga-miR-1589	2.243	0.9599	-1.22447	0.0305242	*		ZnSO4-10-ZnO_NP-5	gga-miR-15c-5p	83.2966	138.154	0.729948	5.59172e-29
Ctrl-ZnO_NP-5	gga-miR-1625-5p	17.047	11.5033	-0.56747	0.00202011			Ctrl-ZnSO4-10	gga-miR-15a	69.0851	79.9903	0.21145	0.00696196			ZnSO4-10-ZnO_NP-5	gga-miR-1609	3.1996	4.7836	0.580205	0.0915885
Ctrl-ZnO_NP-5	gga-miR-1636	2.5795	5.0114	0.958122	0.00859754			Ctrl-ZnSO4-10	gga-miR-15b-5p	607.186	394.086	-0.62363	5.27659e-93			ZnSO4-10-ZnO_NP-5	gga-miR-1625-5p	5.546	11.5033	1.05253	1.15493e-05	**
Ctrl-ZnO_NP-5	gga-miR-1649-5p	2.3552	2.6196	0.153497	0.726608			Ctrl-ZnSO4-10	gga-miR-15c-5p	108.001	83.2966	-0.374722	6.31187e-08			ZnSO4-10-ZnO_NP-5	gga-miR-1636	5.9726	5.0114	-0.253145	0.387533
Ctrl-ZnO_NP-5	gga-miR-1653	4.7103	5.0114	0.0893947	0.774597			Ctrl-ZnSO4-10	gga-miR-1609	9.3085	3.1996	-1.54066	1.03053e-07	**		ZnSO4-10-ZnO_NP-5	gga-miR-1649-5p	2.3464	2.6196	0.158898	0.710549
Ctrl-ZnO_NP-5	gga-miR-1656	1.7944	3.9863	1.15155	0.00659942	**		Ctrl-ZnSO4-10	gga-miR-1625-5p	17.047	5.546	-1.62	7.08883e-14	**		ZnSO4-10-ZnO_NP-5	gga-miR-1653	4.9061	5.0114	0.0306371	0.916671
Ctrl-ZnO_NP-5	gga-miR-16-5p	174.058	191.571	0.138304	0.00643911			Ctrl-ZnSO4-10	gga-miR-1636	2.5795	5.9726	1.21127	0.000432669	**		ZnSO4-10-ZnO_NP-5	gga-miR-1656	4.0528	3.9863	-0.0238687	0.948167
Ctrl-ZnO_NP-5	gga-miR-1662	3.0281	2.2779	-0.410708	0.3387			Ctrl-ZnSO4-10	gga-miR-1649-5p	2.3552	2.3464	-0.0054006	0.986317			ZnSO4-10-ZnO_NP-5	gga-miR-16-5p	265.141	191.571	-0.468885	3.1171e-25
Ctrl-ZnO_NP-5	gga-miR-1663-3p	107.777	95.4435	-0.175333	0.0100819			Ctrl-ZnSO4-10	gga-miR-1653	4.7103	4.9061	0.0587577	0.852443			ZnSO4-10-ZnO_NP-5	gga-miR-1662	4.1595	2.2779	-0.868706	0.026586
Ctrl-ZnO_NP-5	gga-miR-1666	1.458	0.9112	-0.678151	0.303061			Ctrl-ZnSO4-10	gga-miR-1656	1.7944	4.0528	1.17542	0.00481392	**		ZnSO4-10-ZnO_NP-5	gga-miR-1663-3p	71.458	95.4435	0.417551	2.09476e-08
Ctrl-ZnO_NP-5	gga-miR-1669	2.1309	2.5057	0.233751	0.608357			Ctrl-ZnSO4-10	gga-miR-16-5p	174.058	265.141	0.607189	1.24253e-39			ZnSO4-10-ZnO_NP-5	gga-miR-1666	1.4932	0.9112	-0.712568	0.273407
Ctrl-ZnO_NP-5	gga-miR-1671	6.5048	10.3644	0.67206	0.00513856			Ctrl-ZnSO4-10	gga-miR-1662	3.0281	4.1595	0.457997	0.206842			ZnSO4-10-ZnO_NP-5	gga-miR-1669	1.1732	2.5057	1.09476	0.0366177	*
Ctrl-ZnO_NP-5	gga-miR-1674	2.0187	0.1139	-4.14759	4.60262e-05	**		Ctrl-ZnSO4-10	gga-miR-1663-3p	107.777	71.458	-0.592885	1.79233e-16			ZnSO4-10-ZnO_NP-5	gga-miR-1671	4.7994	10.3644	1.11071	1.3752e-05	**
Ctrl-ZnO_NP-5	gga-miR-1676-3p	1.2337	1.2528	0.0221645	0.970172			Ctrl-ZnSO4-10	gga-miR-1666	1.458	1.4932	0.0344167	0.956715			ZnSO4-10-ZnO_NP-5	gga-miR-1676-3p	2.9863	1.2528	-1.2532	0.0117456	*
Ctrl-ZnO_NP-5	gga-miR-1677-3p	4.9346	7.517	0.607224	0.0296555			Ctrl-ZnSO4-10	gga-miR-1669	2.1309	1.1732	-0.861014	0.113824			ZnSO4-10-ZnO_NP-5	gga-miR-1677-3p	4.7994	7.517	0.647303	0.0194827
Ctrl-ZnO_NP-5	gga-miR-1677-5p	35.664	34.51	-0.047454	0.682558			Ctrl-ZnSO4-10	gga-miR-1671	6.5048	4.7994	-0.438651	0.125524			ZnSO4-10-ZnO_NP-5	gga-miR-1677-5p	36.1556	34.51	-0.0672046	0.557079
Ctrl-ZnO_NP-5	gga-miR-1682	1.3458	2.9613	1.13777	0.0208954	*		Ctrl-ZnSO4-10	gga-miR-1674	2.0187	0.8532	-1.24247	0.0383105	*		ZnSO4-10-ZnO_NP-5	gga-miR-1682	5.6526	2.9613	-0.932684	0.00589095
Ctrl-ZnO_NP-5	gga-miR-1683	1.458	1.0251	-0.508226	0.426233			Ctrl-ZnSO4-10	gga-miR-1676-3p	1.2337	2.9863	1.27537	0.0102316	*		ZnSO4-10-ZnO_NP-5	gga-miR-1683	0.8532	1.0251	0.264809	0.707031
Ctrl-ZnO_NP-5	gga-miR-1684a-5p	19.1778	18.9065	-0.0205549	0.896562			Ctrl-ZnSO4-10	gga-miR-1677-3p	4.9346	4.7994	-0.0400791	0.893614			ZnSO4-10-ZnO_NP-5	gga-miR-1684a-5p	15.3581	18.9065	0.299883	0.0676763
Ctrl-ZnO_NP-5	gga-miR-1684b-3p	223.517	200.568	-0.156293	0.000917536			Ctrl-ZnSO4-10	gga-miR-1677-5p	35.664	36.1556	0.0197506	0.861941			ZnSO4-10-ZnO_NP-5	gga-miR-1684b-3p	317.188	200.568	-0.661247	4.84377e-54
Ctrl-ZnO_NP-5	gga-miR-1694	0.2243	1.4806	2.72268	0.00380185	**		Ctrl-ZnSO4-10	gga-miR-1682	1.3458	5.6526	2.07045	4.83332e-07	**		ZnSO4-10-ZnO_NP-5	gga-miR-1694	3.1996	1.4806	-1.11171	0.0175338	*
Ctrl-ZnO_NP-5	gga-miR-1699	0.1122	2.9613	4.72209	1.76566e-07	**		Ctrl-ZnSO4-10	gga-miR-1683	1.458	0.8532	-0.773035	0.235986			ZnSO4-10-ZnO_NP-5	gga-miR-1699	9.4922	2.9613	-1.68051	1.49465e-08	**
Ctrl-ZnO_NP-5	gga-miR-16c-5p	75.5898	68.4506	-0.143128	0.0769677			Ctrl-ZnSO4-10	gga-miR-1684a-5p	19.1778	15.3581	-0.320437	0.0492704			ZnSO4-10-ZnO_NP-5	gga-miR-16c-5p	61.4325	68.4506	0.156061	0.0634895
Ctrl-ZnO_NP-5	gga-miR-1703-5p	1.458	2.5057	0.781223	0.120977			Ctrl-ZnSO4-10	gga-miR-1684b-3p	223.517	317.188	0.504954	3.14677e-34			ZnSO4-10-ZnO_NP-5	gga-miR-1703-5p	2.3464	2.5057	0.0947647	0.824687
Ctrl-ZnO_NP-5	gga-miR-1706	2.8038	2.2779	-0.299679	0.493964			Ctrl-ZnSO4-10	gga-miR-1694	0.2243	3.1996	3.83439	2.69242e-07	**		ZnSO4-10-ZnO_NP-5	gga-miR-1706	6.1859	2.2779	-1.44128	4.61627e-05	**
Ctrl-ZnO_NP-5	gga-miR-1709	1.1215	0.3417	-1.71463	0.0612458			Ctrl-ZnSO4-10	gga-miR-1699	0.1122	9.4922	6.4026	6.76349e-25	**		ZnSO4-10-ZnO_NP-5	gga-miR-1710	1.1732	0.3417	-1.77965	0.0476352	*
Ctrl-ZnO_NP-5	gga-miR-1716	0.7851	1.3667	0.799748	0.248636			Ctrl-ZnSO4-10	gga-miR-16c-5p	75.5898	61.4325	-0.299189	0.000251596			ZnSO4-10-ZnO_NP-5	gga-miR-1712-3p	1.1732	0.6834	-0.779647	0.298332
Ctrl-ZnO_NP-5	gga-miR-1729-5p	6.9534	23.4623	1.75455	6.5219e-20	**		Ctrl-ZnSO4-10	gga-miR-1703-5p	1.458	2.3464	0.686458	0.175937			ZnSO4-10-ZnO_NP-5	gga-miR-1715-3p	1.1732	0.2278	-2.36461	0.0180184	*
Ctrl-ZnO_NP-5	gga-miR-1737	2.0187	3.5307	0.806528	0.0573813			Ctrl-ZnSO4-10	gga-miR-1706	2.8038	6.1859	1.1416	0.000630387	**		ZnSO4-10-ZnO_NP-5	gga-miR-1716	1.3865	1.3667	-0.020751	0.978899
Ctrl-ZnO_NP-5	gga-miR-17-3p	13.346	14.1229	0.081629	0.65951			Ctrl-ZnSO4-10	gga-miR-1709	1.1215	0.32	-1.80929	0.0461271	*		ZnSO4-10-ZnO_NP-5	gga-miR-1729-5p	8.639	23.4623	1.44141	9.2086e-16	**
Ctrl-ZnO_NP-5	gga-miR-1740-5p	1.3458	1.0251	-0.392699	0.547521			Ctrl-ZnSO4-10	gga-miR-1710	0.1122	1.1732	3.3863	0.00450435	**		ZnSO4-10-ZnO_NP-5	gga-miR-1737	0.9599	3.5307	1.879	0.000193888	**
Ctrl-ZnO_NP-5	gga-miR-1747-5p	1.0094	1.1389	0.174143	0.796734			Ctrl-ZnSO4-10	gga-miR-1712-3p	0.6729	1.1732	0.801985	0.2833			ZnSO4-10-ZnO_NP-5	gga-miR-17-3p	6.7192	14.1229	1.07167	8.02969e-07	**
Ctrl-ZnO_NP-5	gga-miR-1759-5p	64.8233	32.0043	-1.01825	1.40597e-23	**		Ctrl-ZnSO4-10	gga-miR-1715-3p	0.01	1.1732	6.87431	0.000657641	**		ZnSO4-10-ZnO_NP-5	gga-miR-1740-5p	1.2798	1.0251	-0.320154	0.629442
Ctrl-ZnO_NP-5	gga-miR-17-5p	111.815	108.997	-0.0368202	0.57302			Ctrl-ZnSO4-10	gga-miR-1716	0.7851	1.3865	0.820499	0.231255			ZnSO4-10-ZnO_NP-5	gga-miR-1747-5p	1.3865	1.1389	-0.283807	0.653712
Ctrl-ZnO_NP-5	gga-miR-1762	1.5701	0.4556	-1.78502	0.0209887	*		Ctrl-ZnSO4-10	gga-miR-1729-5p	6.9534	8.639	0.313146	0.199431			ZnSO4-10-ZnO_NP-5	gga-miR-1759-5p	67.1919	32.0043	-1.07002	7.67053e-27	**
Ctrl-ZnO_NP-5	gga-miR-1775-3p	4.2617	1.5945	-1.41832	0.000978615	**		Ctrl-ZnSO4-10	gga-miR-1737	2.0187	0.9599	-1.07247	0.0652316			ZnSO4-10-ZnO_NP-5	gga-miR-17-5p	96.415	108.997	0.176959	0.00815629
Ctrl-ZnO_NP-5	gga-miR-1782	14.2432	13.3257	-0.096062	0.604513			Ctrl-ZnSO4-10	gga-miR-17-3p	13.346	6.7192	-0.990046	6.51234e-06			ZnSO4-10-ZnO_NP-5	gga-miR-1762	1.9198	0.4556	-2.07512	0.004264	**
Ctrl-ZnO_NP-5	gga-miR-1789	1.0094	0.7973	-0.340303	0.65212			Ctrl-ZnSO4-10	gga-miR-1740-5p	1.3458	1.2798	-0.0725457	0.899016			ZnSO4-10-ZnO_NP-5	gga-miR-1772-5p	1.8131	0.9112	-0.992619	0.107377
Ctrl-ZnO_NP-5	gga-miR-1791-3p	4.1496	3.6446	-0.187212	0.59444			Ctrl-ZnSO4-10	gga-miR-1747-5p	1.0094	1.3865	0.45795	0.476795			ZnSO4-10-ZnO_NP-5	gga-miR-1775-3p	4.2661	1.5945	-1.41981	0.000863064	**
Ctrl-ZnO_NP-5	gga-miR-1794	1.9066	1.5945	-0.257898	0.627437			Ctrl-ZnSO4-10	gga-miR-1759-5p	64.8233	67.1919	0.0517749	0.533979			ZnSO4-10-ZnO_NP-5	gga-miR-1782	16.1047	13.3257	-0.27327	0.124307
Ctrl-ZnO_NP-5	gga-miR-1797	1.1215	0.1139	-3.29959	0.00686236	**		Ctrl-ZnSO4-10	gga-miR-17-5p	111.815	96.415	-0.213779	0.00124351			ZnSO4-10-ZnO_NP-5	gga-miR-1789	1.4932	0.7973	-0.905213	0.178645
Ctrl-ZnO_NP-5	gga-miR-1798-3p	3.5888	3.4168	-0.0708557	0.849151			Ctrl-ZnSO4-10	gga-miR-1762	1.5701	1.9198	0.2901	0.582258			ZnSO4-10-ZnO_NP-5	gga-miR-1791-3p	3.8395	3.6446	-0.075158	0.835675
Ctrl-ZnO_NP-5	gga-miR-1801	1.6823	0.7973	-1.07724	0.100578			Ctrl-ZnSO4-10	gga-miR-1772-5p	0.4486	1.8131	2.01496	0.00620463	**		ZnSO4-10-ZnO_NP-5	gga-miR-1794	2.3464	1.5945	-0.557345	0.263961
Ctrl-ZnO_NP-5	gga-miR-1813	5.2711	3.6446	-0.532344	0.107126			Ctrl-ZnSO4-10	gga-miR-1775-3p	4.2617	4.2661	0.00148874	0.999395			ZnSO4-10-ZnO_NP-5	gga-miR-1798-3p	3.3063	3.4168	0.0474282	0.894369
Ctrl-ZnO_NP-5	gga-miR-181a-3p	35.664	25.5124	-0.48327	0.000111476			Ctrl-ZnSO4-10	gga-miR-1782	14.2432	16.1047	0.177208	0.308901			ZnSO4-10-ZnO_NP-5	gga-miR-1813	3.093	3.6446	0.236754	0.52207
Ctrl-ZnO_NP-5	gga-miR-181a-5p	3574.25	3980.95	0.155471	4.66284e-44			Ctrl-ZnSO4-10	gga-miR-1789	1.0094	1.4932	0.564909	0.369891			ZnSO4-10-ZnO_NP-5	gga-miR-181a-3p	21.3307	25.5124	0.258267	0.0655372
Ctrl-ZnO_NP-5	gga-miR-181b-1-3p	1.6823	2.9613	0.815796	0.0794746			Ctrl-ZnSO4-10	gga-miR-1791-3p	4.1496	3.8395	-0.112054	0.739125			ZnSO4-10-ZnO_NP-5	gga-miR-181a-5p	2610.24	3980.95	0.608929	0
Ctrl-ZnO_NP-5	gga-miR-181b-5p	3665.55	4496.67	0.294828	3.50906e-165			Ctrl-ZnSO4-10	gga-miR-1794	1.9066	2.3464	0.299447	0.528552			ZnSO4-10-ZnO_NP-5	gga-miR-181b-1-3p	1.5998	2.9613	0.888339	0.0552686
Ctrl-ZnO_NP-5	gga-miR-183	0.8972	1.9362	1.10973	0.0692758			Ctrl-ZnSO4-10	gga-miR-1797	1.1215	0.1067	-3.3938	0.00489994	**		ZnSO4-10-ZnO_NP-5	gga-miR-181b-5p	4772.22	4496.67	-0.0858049	6.81213e-18
Ctrl-ZnO_NP-5	gga-miR-184-3p	14.6918	1620.38	6.78517	0	**		Ctrl-ZnSO4-10	gga-miR-1798-3p	3.5888	3.3063	-0.118284	0.743931			ZnSO4-10-ZnO_NP-5	gga-miR-183	2.3464	1.9362	-0.277221	0.561082
Ctrl-ZnO_NP-5	gga-miR-187-3p	2.1309	2.3918	0.166634	0.717777			Ctrl-ZnSO4-10	gga-miR-1801	1.6823	0.5333	-1.65742	0.0197191	*		ZnSO4-10-ZnO_NP-5	gga-miR-184-3p	2654.5	1620.38	-0.712114	0
Ctrl-ZnO_NP-5	gga-miR-187-5p	3.9253	2.6196	-0.583456	0.132024			Ctrl-ZnSO4-10	gga-miR-1813	5.2711	3.093	-0.769097	0.0226767			ZnSO4-10-ZnO_NP-5	gga-miR-187-3p	1.2798	2.3918	0.902178	0.0817489
Ctrl-ZnO_NP-5	gga-miR-18a-3p	3.3645	5.9225	0.815814	0.012529			Ctrl-ZnSO4-10	gga-miR-181a-3p	35.664	21.3307	-0.741537	7.83218e-09			ZnSO4-10-ZnO_NP-5	gga-miR-187-5p	3.093	2.6196	-0.23966	0.559331
Ctrl-ZnO_NP-5	gga-miR-18a-5p	0.8972	1.2528	0.481655	0.481467			Ctrl-ZnSO4-10	gga-miR-181a-5p	3574.25	2610.24	-0.453458	2.94001e-302			ZnSO4-10-ZnO_NP-5	gga-miR-18a-3p	3.5196	5.9225	0.750795	0.0182935
Ctrl-ZnO_NP-5	gga-miR-18b-3p	2.5795	6.6059	1.35666	6.53021e-05	**		Ctrl-ZnSO4-10	gga-miR-181b-1-3p	1.6823	1.5998	-0.0725434	0.887837			ZnSO4-10-ZnO_NP-5	gga-miR-18a-5p	0.9599	1.2528	0.3842	0.557114
Ctrl-ZnO_NP-5	gga-miR-18b-5p	0.1122	1.0251	3.19162	0.0109154	*		Ctrl-ZnSO4-10	gga-miR-181b-5p	3665.55	4772.22	0.380633	5.41468e-291			ZnSO4-10-ZnO_NP-5	gga-miR-18b-3p	1.7065	6.6059	1.95271	1.40012e-07	**
Ctrl-ZnO_NP-5	gga-miR-193a-3p	13.7946	15.4896	0.167196	0.352063			Ctrl-ZnSO4-10	gga-miR-183	0.8972	2.3464	1.38695	0.0157445	*		ZnSO4-10-ZnO_NP-5	gga-miR-18b-5p	0.7466	1.0251	0.457357	0.535029
Ctrl-ZnO_NP-5	gga-miR-193a-5p	340.603	439.291	0.367086	6.51852e-26			Ctrl-ZnSO4-10	gga-miR-184-3p	14.6918	2654.5	7.49729	0	**		ZnSO4-10-ZnO_NP-5	gga-miR-193a-3p	9.5988	15.4896	0.690374	0.000375858
Ctrl-ZnO_NP-5	gga-miR-193b-3p	34.7668	78.0177	1.16609	1.31416e-34	**		Ctrl-ZnSO4-10	gga-miR-187-3p	2.1309	1.2798	-0.735545	0.16703			ZnSO4-10-ZnO_NP-5	gga-miR-193a-5p	305.35	439.291	0.524715	8.66582e-50
Ctrl-ZnO_NP-5	gga-miR-193b-5p	7.402	2.5057	-1.5627	2.69963e-06	**		Ctrl-ZnSO4-10	gga-miR-187-5p	3.9253	3.093	-0.343796	0.343624			ZnSO4-10-ZnO_NP-5	gga-miR-193b-3p	29.4364	78.0177	1.4062	5.01225e-47	**
Ctrl-ZnO_NP-5	gga-miR-196-5p	28.3742	22.4372	-0.338687	0.0132791			Ctrl-ZnSO4-10	gga-miR-18a-3p	3.3645	3.5196	0.0650194	0.862799			ZnSO4-10-ZnO_NP-5	gga-miR-193b-5p	6.5059	2.5057	-1.37653	5.38965e-05	**
Ctrl-ZnO_NP-5	gga-miR-199-3p	37.3463	22.665	-0.720499	1.53695e-08			Ctrl-ZnSO4-10	gga-miR-18b-3p	2.5795	1.7065	-0.596051	0.205219			ZnSO4-10-ZnO_NP-5	gga-miR-196-5p	69.7515	22.4372	-1.63633	8.33767e-52	**
Ctrl-ZnO_NP-5	gga-miR-19b-3p	1.1215	1.4806	0.400752	0.516307			Ctrl-ZnSO4-10	gga-miR-193a-3p	13.7946	9.5988	-0.523178	0.00861754			ZnSO4-10-ZnO_NP-5	gga-miR-199-3p	30.8229	22.665	-0.443536	0.000788658
Ctrl-ZnO_NP-5	gga-miR-1a-3p	109.347	85.7625	-0.350499	5.01376e-07			Ctrl-ZnSO4-10	gga-miR-193a-5p	340.603	305.35	-0.157628	2.72155e-05			ZnSO4-10-ZnO_NP-5	gga-miR-19b-3p	2.1331	1.4806	-0.52677	0.312695
Ctrl-ZnO_NP-5	gga-miR-1b-3p	2.243	1.9362	-0.212202	0.661402			Ctrl-ZnSO4-10	gga-miR-193b-3p	34.7668	29.4364	-0.240109	0.0441675			ZnSO4-10-ZnO_NP-5	gga-miR-1a-3p	101.534	85.7625	-0.24355	0.000523167
Ctrl-ZnO_NP-5	gga-miR-202-3p	1491.16	1297.49	-0.200717	1.00658e-27			Ctrl-ZnSO4-10	gga-miR-193b-5p	7.402	6.5059	-0.186166	0.467505			ZnSO4-10-ZnO_NP-5	gga-miR-1b-3p	0.6399	1.9362	1.59731	0.0147274	*
Ctrl-ZnO_NP-5	gga-miR-202-5p	249.648	149.999	-0.734944	3.39211e-50			Ctrl-ZnSO4-10	gga-miR-196-5p	28.3742	69.7515	1.29764	1.72944e-37	**		ZnSO4-10-ZnO_NP-5	gga-miR-202-3p	1202.52	1297.49	0.109657	1.05598e-08
Ctrl-ZnO_NP-5	gga-miR-203	3.2524	2.2779	-0.5138	0.222687			Ctrl-ZnSO4-10	gga-miR-199-3p	37.3463	30.8229	-0.276963	0.0168206			ZnSO4-10-ZnO_NP-5	gga-miR-202-5p	244.664	149.999	-0.705847	5.35147e-47
Ctrl-ZnO_NP-5	gga-miR-204	27.477	51.4803	0.905796	5.69003e-16			Ctrl-ZnSO4-10	gga-miR-19b-3p	1.1215	2.1331	0.927522	0.0954488			ZnSO4-10-ZnO_NP-5	gga-miR-203	3.9462	2.2779	-0.79276	0.0459132
Ctrl-ZnO_NP-5	gga-miR-20a-5p	13.6824	14.3507	0.0687998	0.707486			Ctrl-ZnSO4-10	gga-miR-1a-3p	109.347	101.534	-0.106949	0.103671			ZnSO4-10-ZnO_NP-5	gga-miR-204	58.9795	51.4803	-0.196193	0.0318648
Ctrl-ZnO_NP-5	gga-miR-20b-3p	4.0374	5.1253	0.34421	0.287399			Ctrl-ZnSO4-10	gga-miR-1b-3p	2.243	0.6399	-1.80951	0.00396754	**		ZnSO4-10-ZnO_NP-5	gga-miR-206	1.2798	0.4556	-1.49008	0.0667135
Ctrl-ZnO_NP-5	gga-miR-20b-5p	70.0944	71.6396	0.0314581	0.699358			Ctrl-ZnSO4-10	gga-miR-202-3p	1491.16	1202.52	-0.310374	1.29636e-63			ZnSO4-10-ZnO_NP-5	gga-miR-20a-5p	10.5587	14.3507	0.442689	0.0219463
Ctrl-ZnO_NP-5	gga-miR-211	27.477	51.4803	0.905796	5.69003e-16			Ctrl-ZnSO4-10	gga-miR-202-5p	249.648	244.664	-0.029097	0.497601			ZnSO4-10-ZnO_NP-5	gga-miR-20b-3p	2.2397	5.1253	1.19433	0.00124563	**
Ctrl-ZnO_NP-5	gga-miR-2128	3.5888	4.6697	0.379828	0.265788			Ctrl-ZnSO4-10	gga-miR-203	3.2524	3.9462	0.278959	0.440636			ZnSO4-10-ZnO_NP-5	gga-miR-20b-5p	45.6478	71.6396	0.650212	3.77008e-13
Ctrl-ZnO_NP-5	gga-miR-2131-5p	6.6169	3.9863	-0.731105	0.0164591			Ctrl-ZnSO4-10	gga-miR-204	27.477	58.9795	1.10199	4.79083e-25	**		ZnSO4-10-ZnO_NP-5	gga-miR-211	58.9795	51.4803	-0.196193	0.0318648
Ctrl-ZnO_NP-5	gga-miR-21-3p	33.421	37.0157	0.147382	0.202804			Ctrl-ZnSO4-10	gga-miR-206	0.4486	1.2798	1.51242	0.0621562			ZnSO4-10-ZnO_NP-5	gga-miR-2128	4.0528	4.6697	0.204411	0.528869
Ctrl-ZnO_NP-5	gga-miR-215-5p	3.3645	1.7084	-0.977746	0.029581			Ctrl-ZnSO4-10	gga-miR-20a-5p	13.6824	10.5587	-0.373889	0.0549803			ZnSO4-10-ZnO_NP-5	gga-miR-2131-5p	4.7994	3.9863	-0.267804	0.414861
Ctrl-ZnO_NP-5	gga-miR-21-5p	3874.82	2786.54	-0.475653	0			Ctrl-ZnSO4-10	gga-miR-20b-3p	4.0374	2.2397	-0.850121	0.0300736			ZnSO4-10-ZnO_NP-5	gga-miR-21-3p	18.1311	37.0157	1.02967	9.67269e-15	**
Ctrl-ZnO_NP-5	gga-miR-2188-5p	4.8225	8.7699	0.862779	0.00140262			Ctrl-ZnSO4-10	gga-miR-20b-5p	70.0944	45.6478	-0.618754	5.2249e-12			ZnSO4-10-ZnO_NP-5	gga-miR-215-5p	2.453	1.7084	-0.521901	0.281412
Ctrl-ZnO_NP-5	gga-miR-219b	33.8696	29.6126	-0.19378	0.112364			Ctrl-ZnSO4-10	gga-miR-211	27.477	58.9795	1.10199	4.79083e-25	**		ZnSO4-10-ZnO_NP-5	gga-miR-21-5p	4173.25	2786.54	-0.582697	0
Ctrl-ZnO_NP-5	gga-miR-221-3p	5947.26	7950.4	0.418803	0			Ctrl-ZnSO4-10	gga-miR-2128	3.5888	4.0528	0.175417	0.617553			ZnSO4-10-ZnO_NP-5	gga-miR-2188-5p	2.3464	8.7699	1.90211	2.34102e-09	**
Ctrl-ZnO_NP-5	gga-miR-221-5p	286.322	264.235	-0.115815	0.00511571			Ctrl-ZnSO4-10	gga-miR-2131-5p	6.6169	4.7994	-0.463301	0.104166			ZnSO4-10-ZnO_NP-5	gga-miR-219b	42.9815	29.6126	-0.537505	2.2689e-06
Ctrl-ZnO_NP-5	gga-miR-222a	10513.6	13617.9	0.373248	0			Ctrl-ZnSO4-10	gga-miR-21-3p	33.421	18.1311	-0.882288	8.67118e-11			ZnSO4-10-ZnO_NP-5	gga-miR-221-3p	9703.14	7950.4	-0.287424	0
Ctrl-ZnO_NP-5	gga-miR-222b-3p	2.0187	5.4669	1.4373	0.000151505	**		Ctrl-ZnSO4-10	gga-miR-215-5p	3.3645	2.453	-0.455845	0.255242			ZnSO4-10-ZnO_NP-5	gga-miR-221-5p	297.031	264.235	-0.168789	3.08101e-05
Ctrl-ZnO_NP-5	gga-miR-223	14.5796	17.1981	0.238298	0.167489			Ctrl-ZnSO4-10	gga-miR-21-5p	3874.82	4173.25	0.107044	8.56669e-24			ZnSO4-10-ZnO_NP-5	gga-miR-222a	11770	13617.9	0.210392	1.12232e-267
Ctrl-ZnO_NP-5	gga-miR-22-3p	451.969	401.706	-0.170084	3.09399e-07			Ctrl-ZnSO4-10	gga-miR-2188-5p	4.8225	2.3464	-1.03933	0.00499379	**		ZnSO4-10-ZnO_NP-5	gga-miR-222b-3p	6.2926	5.4669	-0.202933	0.473444
Ctrl-ZnO_NP-5	gga-miR-22-5p	78.8422	65.831	-0.260201	0.00129219			Ctrl-ZnSO4-10	gga-miR-219b	33.8696	42.9815	0.343725	0.00168546			ZnSO4-10-ZnO_NP-5	gga-miR-223	14.9315	17.1981	0.20389	0.228107
Ctrl-ZnO_NP-5	gga-miR-23b-3p	12.4488	19.1343	0.620154	0.000391046			Ctrl-ZnSO4-10	gga-miR-221-3p	5947.26	9703.14	0.706227	0			ZnSO4-10-ZnO_NP-5	gga-miR-22-3p	387.686	401.706	0.0512492	0.132789
Ctrl-ZnO_NP-5	gga-miR-23b-5p	2.0187	2.5057	0.311787	0.500612			Ctrl-ZnSO4-10	gga-miR-221-5p	286.322	297.031	0.0529746	0.180298			ZnSO4-10-ZnO_NP-5	gga-miR-22-5p	76.0441	65.831	-0.208069	0.00988628
Ctrl-ZnO_NP-5	gga-miR-24-3p	1341.89	1451.24	0.113025	7.47008e-10			Ctrl-ZnSO4-10	gga-miR-222a	10513.6	11770	0.162856	7.73371e-143			ZnSO4-10-ZnO_NP-5	gga-miR-23b-3p	19.8376	19.1343	-0.0520764	0.736599
Ctrl-ZnO_NP-5	gga-miR-26a-5p	929.957	868.104	-0.0992963	1.43221e-05			Ctrl-ZnSO4-10	gga-miR-222b-3p	2.0187	6.2926	1.64023	5.64375e-06	**		ZnSO4-10-ZnO_NP-5	gga-miR-23b-5p	3.8395	2.5057	-0.615705	0.114855
Ctrl-ZnO_NP-5	gga-miR-27b-3p	7.7384	5.1253	-0.594399	0.0306159			Ctrl-ZnSO4-10	gga-miR-223	14.5796	14.9315	0.034408	0.846669			ZnSO4-10-ZnO_NP-5	gga-miR-24-3p	1474.38	1451.24	-0.0228204	0.197799
Ctrl-ZnO_NP-5	gga-miR-27b-5p	5.0468	3.3029	-0.611636	0.0741354			Ctrl-ZnSO4-10	gga-miR-22-3p	451.969	387.686	-0.221333	1.91561e-11			ZnSO4-10-ZnO_NP-5	gga-miR-26a-5p	857.176	868.104	0.0182756	0.428021
Ctrl-ZnO_NP-5	gga-miR-2954	991.528	1498.4	0.595694	4.91552e-202			Ctrl-ZnSO4-10	gga-miR-22-5p	78.8422	76.0441	-0.0521317	0.49624			ZnSO4-10-ZnO_NP-5	gga-miR-27b-3p	5.9726	5.1253	-0.220723	0.448894
Ctrl-ZnO_NP-5	gga-miR-29a-3p	81.7581	77.3343	-0.0802532	0.297147			Ctrl-ZnSO4-10	gga-miR-23b-3p	12.4488	19.8376	0.672231	8.31007e-05			ZnSO4-10-ZnO_NP-5	gga-miR-27b-5p	4.9061	3.3029	-0.570843	0.0948684
Ctrl-ZnO_NP-5	gga-miR-29b-1-5p	1.3458	2.6196	0.960883	0.0587827			Ctrl-ZnSO4-10	gga-miR-23b-5p	2.0187	3.8395	0.927492	0.0237959			ZnSO4-10-ZnO_NP-5	gga-miR-2954	1321.87	1498.4	0.180842	1.28642e-23
Ctrl-ZnO_NP-5	gga-miR-29b-3p	2.5795	2.3918	-0.108995	0.805988			Ctrl-ZnSO4-10	gga-miR-24-3p	1341.89	1474.38	0.135846	4.42837e-14			ZnSO4-10-ZnO_NP-5	gga-miR-29a-3p	86.6028	77.3343	-0.163305	0.0294207
Ctrl-ZnO_NP-5	gga-miR-29c-3p	81.7581	77.3343	-0.0802532	0.297147			Ctrl-ZnSO4-10	gga-miR-26a-5p	929.957	857.176	-0.117572	1.92208e-07			ZnSO4-10-ZnO_NP-5	gga-miR-29b-1-5p	2.3464	2.6196	0.158898	0.710549
Ctrl-ZnO_NP-5	gga-miR-301a-3p	2.4673	4.5558	0.884771	0.0192013			Ctrl-ZnSO4-10	gga-miR-27b-3p	7.7384	5.9726	-0.373676	0.149635			ZnSO4-10-ZnO_NP-5	gga-miR-29b-3p	1.3865	2.3918	0.786649	0.121191
Ctrl-ZnO_NP-5	gga-miR-301a-5p	33.8696	23.4623	-0.529647	4.24638e-05			Ctrl-ZnSO4-10	gga-miR-27b-5p	5.0468	4.9061	-0.0407923	0.890629			ZnSO4-10-ZnO_NP-5	gga-miR-29c-3p	86.6028	77.3343	-0.163305	0.0294207
Ctrl-ZnO_NP-5	gga-miR-301b-3p	1.2337	1.7084	0.469654	0.418466			Ctrl-ZnSO4-10	gga-miR-2954	991.528	1321.87	0.414852	5.70122e-96			ZnSO4-10-ZnO_NP-5	gga-miR-301a-3p	3.4129	4.5558	0.416706	0.223405
Ctrl-ZnO_NP-5	gga-miR-301b-5p	26.2433	15.148	-0.792822	2.59562e-07			Ctrl-ZnSO4-10	gga-miR-29a-3p	81.7581	86.6028	0.083052	0.25953			ZnSO4-10-ZnO_NP-5	gga-miR-301a-5p	24.3171	23.4623	-0.0516267	0.711555
Ctrl-ZnO_NP-5	gga-miR-3064-5p	0.6729	1.0251	0.607301	0.435869			Ctrl-ZnSO4-10	gga-miR-29b-1-5p	1.3458	2.3464	0.801985	0.121319			ZnSO4-10-ZnO_NP-5	gga-miR-301b-3p	0.9599	1.7084	0.83169	0.171702
Ctrl-ZnO_NP-5	gga-miR-30a-3p	77.4964	78.9289	0.0264243	0.733238			Ctrl-ZnSO4-10	gga-miR-29b-3p	2.5795	1.3865	-0.895644	0.0713284			ZnSO4-10-ZnO_NP-5	gga-miR-301b-5p	25.4902	15.148	-0.750815	9.80702e-07
Ctrl-ZnO_NP-5	gga-miR-30a-5p	291.593	239.862	-0.281752	2.41853e-11			Ctrl-ZnSO4-10	gga-miR-29c-3p	81.7581	86.6028	0.083052	0.25953			ZnSO4-10-ZnO_NP-5	gga-miR-3064-5p	0.6399	1.0251	0.679846	0.378291
Ctrl-ZnO_NP-5	gga-miR-30b-3p	4.0374	4.2141	0.061798	0.855044			Ctrl-ZnSO4-10	gga-miR-301a-3p	2.4673	3.4129	0.468065	0.244657			ZnSO4-10-ZnO_NP-5	gga-miR-30a-3p	138.65	78.9289	-0.812821	1.72931e-34
Ctrl-ZnO_NP-5	gga-miR-30b-5p	4.486	2.2779	-0.977725	0.0117018			Ctrl-ZnSO4-10	gga-miR-301a-5p	33.8696	24.3171	-0.47802	0.000147884			ZnSO4-10-ZnO_NP-5	gga-miR-30a-5p	171.926	239.862	0.480417	4.84226e-24
Ctrl-ZnO_NP-5	gga-miR-30c-1-3p	377.164	316.513	-0.252929	7.25008e-12			Ctrl-ZnSO4-10	gga-miR-301b-3p	1.2337	0.9599	-0.362036	0.581371			ZnSO4-10-ZnO_NP-5	gga-miR-30b-3p	6.2926	4.2141	-0.578432	0.0549991
Ctrl-ZnO_NP-5	gga-miR-30c-2-3p	99.7023	98.8604	-0.012234	0.859183			Ctrl-ZnSO4-10	gga-miR-301b-5p	26.2433	25.4902	-0.0420065	0.750686			ZnSO4-10-ZnO_NP-5	gga-miR-30b-5p	4.2661	2.2779	-0.905213	0.0200196
Ctrl-ZnO_NP-5	gga-miR-30c-5p	224.078	204.668	-0.130712	0.00530403			Ctrl-ZnSO4-10	gga-miR-30a-3p	77.4964	138.65	0.839245	1.2317e-36			ZnSO4-10-ZnO_NP-5	gga-miR-30c-1-3p	359.743	316.513	-0.184703	5.58657e-07
Ctrl-ZnO_NP-5	gga-miR-30d	4030.04	3752.82	-0.102817	8.99645e-21			Ctrl-ZnSO4-10	gga-miR-30a-5p	291.593	171.926	-0.762169	3.38111e-64			ZnSO4-10-ZnO_NP-5	gga-miR-30c-2-3p	117.213	98.8604	-0.245662	0.000171232
Ctrl-ZnO_NP-5	gga-miR-30e-3p	40.823	27.6764	-0.560726	2.20841e-06			Ctrl-ZnSO4-10	gga-miR-30b-3p	4.0374	6.2926	0.64023	0.0347496			ZnSO4-10-ZnO_NP-5	gga-miR-30c-5p	224.933	204.668	-0.136206	0.00325234
Ctrl-ZnO_NP-5	gga-miR-30e-5p	35.3276	25.3985	-0.476052	0.000148755			Ctrl-ZnSO4-10	gga-miR-30b-5p	4.486	4.2661	-0.0725118	0.820537			ZnSO4-10-ZnO_NP-5	gga-miR-30d	2593.93	3752.82	0.532839	0
Ctrl-ZnO_NP-5	gga-miR-31-3p	3.8131	7.9726	1.06409	0.000289267	**		Ctrl-ZnSO4-10	gga-miR-30c-1-3p	377.164	359.743	-0.0682254	0.0522884			ZnSO4-10-ZnO_NP-5	gga-miR-30e-3p	41.595	27.6764	-0.587754	4.62874e-07
Ctrl-ZnO_NP-5	gga-miR-31-5p	28204.5	21843.2	-0.36874	0			Ctrl-ZnSO4-10	gga-miR-30c-2-3p	99.7023	117.213	0.233428	0.000326421			ZnSO4-10-ZnO_NP-5	gga-miR-30e-5p	13.865	25.3985	0.873296	2.3236e-08
Ctrl-ZnO_NP-5	gga-miR-33-5p	10.5422	5.1253	-1.04047	4.26734e-05	**		Ctrl-ZnSO4-10	gga-miR-30c-5p	224.078	224.933	0.00549369	0.903347			ZnSO4-10-ZnO_NP-5	gga-miR-31-3p	3.3063	7.9726	1.26983	2.26935e-05	**
Ctrl-ZnO_NP-5	gga-miR-34a-3p	1.5701	0.6834	-1.20005	0.0845281			Ctrl-ZnSO4-10	gga-miR-30d	4030.04	2593.93	-0.635656	0			ZnSO4-10-ZnO_NP-5	gga-miR-31-5p	22120.8	21843.2	-0.0182186	6.70438e-05
Ctrl-ZnO_NP-5	gga-miR-34a-5p	4.8225	7.9726	0.725269	0.00876461			Ctrl-ZnSO4-10	gga-miR-30e-3p	40.823	41.595	0.0270279	0.798215			ZnSO4-10-ZnO_NP-5	gga-miR-33-5p	7.3591	5.1253	-0.521893	0.0583358
Ctrl-ZnO_NP-5	gga-miR-34b-5p	13.5703	6.7198	-1.01396	5.35279e-06	**		Ctrl-ZnSO4-10	gga-miR-30e-5p	35.3276	13.865	-1.34935	4.69244e-21	**		ZnSO4-10-ZnO_NP-5	gga-miR-34a-3p	1.0665	0.6834	-0.642082	0.404969
Ctrl-ZnO_NP-5	gga-miR-34c-5p	14.2432	3.6446	-1.96644	1.76631e-14	**		Ctrl-ZnSO4-10	gga-miR-31-3p	3.8131	3.3063	-0.205747	0.566127			ZnSO4-10-ZnO_NP-5	gga-miR-34a-5p	4.1595	7.9726	0.93864	0.000910828
Ctrl-ZnO_NP-5	gga-miR-3523	113.497	242.367	1.09454	6.33404e-94	**		Ctrl-ZnSO4-10	gga-miR-31-5p	28204.5	22120.8	-0.350521	0			ZnSO4-10-ZnO_NP-5	gga-miR-34b-5p	7.8924	6.7198	-0.232046	0.359664
Ctrl-ZnO_NP-5	gga-miR-3524a	2.9159	2.5057	-0.218728	0.605496			Ctrl-ZnSO4-10	gga-miR-33-5p	10.5422	7.3591	-0.518575	0.0228014			ZnSO4-10-ZnO_NP-5	gga-miR-34c-5p	4.4795	3.6446	-0.297577	0.384144
Ctrl-ZnO_NP-5	gga-miR-3525	3.0281	1.9362	-0.645185	0.149227			Ctrl-ZnSO4-10	gga-miR-34a-3p	1.5701	1.0665	-0.557972	0.354671			ZnSO4-10-ZnO_NP-5	gga-miR-3523	199.016	242.367	0.284312	4.90912e-10
Ctrl-ZnO_NP-5	gga-miR-3527	1.0094	1.1389	0.174143	0.796734			Ctrl-ZnSO4-10	gga-miR-34a-5p	4.8225	4.1595	-0.213371	0.503947			ZnSO4-10-ZnO_NP-5	gga-miR-3524a	2.2397	2.5057	0.161908	0.711722
Ctrl-ZnO_NP-5	gga-miR-3529	6.0562	4.4419	-0.447236	0.140418			Ctrl-ZnSO4-10	gga-miR-34b-5p	13.5703	7.8924	-0.781917	0.000197005			ZnSO4-10-ZnO_NP-5	gga-miR-3525	2.8797	1.9362	-0.572691	0.202806
Ctrl-ZnO_NP-5	gga-miR-3530-3p	3.5888	4.8975	0.448544	0.183539			Ctrl-ZnSO4-10	gga-miR-34c-5p	14.2432	4.4795	-1.66886	2.81381e-12	**		ZnSO4-10-ZnO_NP-5	gga-miR-3527	0.32	1.1389	1.8315	0.0430686	*
Ctrl-ZnO_NP-5	gga-miR-3532-3p	4.486	2.9613	-0.599199	0.0986628			Ctrl-ZnSO4-10	gga-miR-3523	113.497	199.016	0.810231	6.56343e-49			ZnSO4-10-ZnO_NP-5	gga-miR-3529	4.3728	4.4419	0.0226195	0.940666
Ctrl-ZnO_NP-5	gga-miR-3533	3.5888	1.0251	-1.80774	0.000327983	**		Ctrl-ZnSO4-10	gga-miR-3524a	2.9159	2.2397	-0.380636	0.370288			ZnSO4-10-ZnO_NP-5	gga-miR-3530-3p	9.4922	4.8975	-0.954697	0.000259693
Ctrl-ZnO_NP-5	gga-miR-3534	2.4673	2.7335	0.147816	0.730552			Ctrl-ZnSO4-10	gga-miR-3525	3.0281	2.8797	-0.0724943	0.851499			ZnSO4-10-ZnO_NP-5	gga-miR-3530-5p	1.4932	0.7973	-0.905213	0.178645
Ctrl-ZnO_NP-5	gga-miR-3536	3.1402	5.5808	0.829615	0.0139781			Ctrl-ZnSO4-10	gga-miR-3527	1.0094	0.32	-1.65735	0.0760204			ZnSO4-10-ZnO_NP-5	gga-miR-3532-3p	2.8797	2.9613	0.0403121	0.915147
Ctrl-ZnO_NP-5	gga-miR-3540	2.6916	2.6196	-0.0391175	0.92799			Ctrl-ZnSO4-10	gga-miR-3529	6.0562	4.3728	-0.469855	0.115438			ZnSO4-10-ZnO_NP-5	gga-miR-3533	0.4266	1.0251	1.26481	0.142652
Ctrl-ZnO_NP-5	gga-miR-365-1-5p	11.3273	8.3143	-0.446137	0.0435714			Ctrl-ZnSO4-10	gga-miR-3530-3p	3.5888	9.4922	1.40324	6.14957e-07	**		ZnSO4-10-ZnO_NP-5	gga-miR-3534	4.3728	2.7335	-0.677808	0.0664249
Ctrl-ZnO_NP-5	gga-miR-365-2-5p	318.958	310.476	-0.0388815	0.314746			Ctrl-ZnSO4-10	gga-miR-3530-5p	0.6729	1.4932	1.14994	0.0999075			ZnSO4-10-ZnO_NP-5	gga-miR-3535	1.3865	0.6834	-1.02065	0.153383
Ctrl-ZnO_NP-5	gga-miR-365-3p	148.825	239.065	0.683788	1.10902e-42			Ctrl-ZnSO4-10	gga-miR-3532-3p	4.486	2.8797	-0.639511	0.0739727			ZnSO4-10-ZnO_NP-5	gga-miR-3536	2.1331	5.5808	1.38752	0.000152707	**
Ctrl-ZnO_NP-5	gga-miR-365b-5p	4.3739	3.9863	-0.13387	0.693236			Ctrl-ZnSO4-10	gga-miR-3533	3.5888	0.4266	-3.07255	5.14029e-07	**		ZnSO4-10-ZnO_NP-5	gga-miR-3538	3.6262	0.6834	-2.40766	1.25122e-05	**
Ctrl-ZnO_NP-5	gga-miR-375	3.9253	9.9088	1.33591	1.26943e-06	**		Ctrl-ZnSO4-10	gga-miR-3534	2.4673	4.3728	0.825624	0.028553			ZnSO4-10-ZnO_NP-5	gga-miR-3540	2.0264	2.6196	0.370428	0.408969
Ctrl-ZnO_NP-5	gga-miR-383-5p	75.3655	69.1339	-0.124511	0.123279			Ctrl-ZnSO4-10	gga-miR-3535	0.5608	1.3865	1.30589	0.0808148			ZnSO4-10-ZnO_NP-5	gga-miR-365-1-5p	11.4119	8.3143	-0.456872	0.0363794
Ctrl-ZnO_NP-5	gga-miR-429-3p	1.6823	2.2779	0.437269	0.379295			Ctrl-ZnSO4-10	gga-miR-3536	3.1402	2.1331	-0.557905	0.186877			ZnSO4-10-ZnO_NP-5	gga-miR-365-2-5p	563.558	310.476	-0.860082	3.9096e-148
Ctrl-ZnO_NP-5	gga-miR-449a	0.01	4.6697	8.86719	3.28507e-13	**		Ctrl-ZnSO4-10	gga-miR-3538	0.3365	3.6262	3.42978	1.48106e-07	**		ZnSO4-10-ZnO_NP-5	gga-miR-365-3p	202.429	239.065	0.239985	1.47308e-07
Ctrl-ZnO_NP-5	gga-miR-449c-5p	0.4486	1.2528	1.48165	0.0718093			Ctrl-ZnSO4-10	gga-miR-3540	2.6916	2.0264	-0.409545	0.357255			ZnSO4-10-ZnO_NP-5	gga-miR-365b-5p	3.3063	3.9863	0.269833	0.448467
Ctrl-ZnO_NP-5	gga-miR-451	2.5795	1.8223	-0.501331	0.289923			Ctrl-ZnSO4-10	gga-miR-365-1-5p	11.3273	11.4119	0.010735	0.959145			ZnSO4-10-ZnO_NP-5	gga-miR-375	9.2789	9.9088	0.0947566	0.663529
Ctrl-ZnO_NP-5	gga-miR-454-3p	15.4768	12.7562	-0.278909	0.128553			Ctrl-ZnSO4-10	gga-miR-365-2-5p	318.958	563.558	0.8212	3.20919e-138			ZnSO4-10-ZnO_NP-5	gga-miR-383-5p	34.7691	69.1339	0.991588	1.04049e-24
Ctrl-ZnO_NP-5	gga-miR-455-3p	8.6356	13.8951	0.686208	0.00095635			Ctrl-ZnSO4-10	gga-miR-365-3p	148.825	202.429	0.443803	4.86821e-18			ZnSO4-10-ZnO_NP-5	gga-miR-429-3p	3.093	2.2779	-0.441302	0.297672
Ctrl-ZnO_NP-5	gga-miR-455-5p	7.0655	5.353	-0.400444	0.150193			Ctrl-ZnSO4-10	gga-miR-365b-5p	4.3739	3.3063	-0.403703	0.245397			ZnSO4-10-ZnO_NP-5	gga-miR-449a	5.9726	4.6697	-0.355029	0.233361
Ctrl-ZnO_NP-5	gga-miR-456-3p	2545.72	2207.84	-0.205434	3.69282e-48			Ctrl-ZnSO4-10	gga-miR-375	3.9253	9.2789	1.24115	7.27622e-06	**		ZnSO4-10-ZnO_NP-5	gga-miR-449c-5p	2.6663	1.2528	-1.08968	0.0334598	*
Ctrl-ZnO_NP-5	gga-miR-458a-3p	5.0468	3.7585	-0.425212	0.19962			Ctrl-ZnSO4-10	gga-miR-383-5p	75.3655	34.7691	-1.1161	2.22339e-32	**		ZnSO4-10-ZnO_NP-5	gga-miR-451	1.9198	1.8223	-0.0751955	0.887297
Ctrl-ZnO_NP-5	gga-miR-460a-5p	1.2337	0.2278	-2.43715	0.0140039	*		Ctrl-ZnSO4-10	gga-miR-429-3p	1.6823	3.093	0.878572	0.0533171			ZnSO4-10-ZnO_NP-5	gga-miR-454-3p	9.9188	12.7562	0.362961	0.0725128
Ctrl-ZnO_NP-5	gga-miR-489-3p	10.3179	6.1503	-0.746421	0.00223472			Ctrl-ZnSO4-10	gga-miR-449a	0.01	5.9726	9.22222	5.70931e-17	**		ZnSO4-10-ZnO_NP-5	gga-miR-455-3p	6.8258	13.8951	1.02551	2.34652e-06	**
Ctrl-ZnO_NP-5	gga-miR-499-5p	8.7478	7.2892	-0.26316	0.280733			Ctrl-ZnSO4-10	gga-miR-449c-5p	0.4486	2.6663	2.57134	0.000103242	**		ZnSO4-10-ZnO_NP-5	gga-miR-455-5p	4.0528	5.353	0.401429	0.202075
Ctrl-ZnO_NP-5	gga-miR-6516-5p	4.486	2.5057	-0.840216	0.026451			Ctrl-ZnSO4-10	gga-miR-451	2.5795	1.9198	-0.426135	0.350038			ZnSO4-10-ZnO_NP-5	gga-miR-456-3p	1874.97	2207.84	0.235769	1.43297e-55
Ctrl-ZnO_NP-5	gga-miR-6542-3p	72.6739	70.159	-0.0508091	0.53174			Ctrl-ZnSO4-10	gga-miR-454-3p	15.4768	9.9188	-0.64187	0.000823394			ZnSO4-10-ZnO_NP-5	gga-miR-458a-3p	7.0391	3.7585	-0.905234	0.00267802
Ctrl-ZnO_NP-5	gga-miR-6543-5p	2.0187	1.1389	-0.825785	0.147321			Ctrl-ZnSO4-10	gga-miR-455-3p	8.6356	6.8258	-0.339298	0.164266			ZnSO4-10-ZnO_NP-5	gga-miR-489-3p	13.4384	6.1503	-1.12763	6.09365e-07	**
Ctrl-ZnO_NP-5	gga-miR-6547-5p	2.0187	1.7084	-0.240781	0.639612			Ctrl-ZnSO4-10	gga-miR-455-5p	7.0655	4.0528	-0.801873	0.0061588			ZnSO4-10-ZnO_NP-5	gga-miR-490-3p	1.2798	0.7973	-0.682724	0.331514
Ctrl-ZnO_NP-5	gga-miR-6548-3p	1.9066	2.0501	0.104692	0.831426			Ctrl-ZnSO4-10	gga-miR-456-3p	2545.72	1874.97	-0.441203	2.39013e-205			ZnSO4-10-ZnO_NP-5	gga-miR-499-5p	5.7593	7.2892	0.339867	0.20215
Ctrl-ZnO_NP-5	gga-miR-6550-3p	4.9346	5.1253	0.0547033	0.858186			Ctrl-ZnSO4-10	gga-miR-458a-3p	5.0468	7.0391	0.480022	0.0848787			ZnSO4-10-ZnO_NP-5	gga-miR-6516-5p	3.093	2.5057	-0.303793	0.463504
Ctrl-ZnO_NP-5	gga-miR-6556-5p	1.1215	0.7973	-0.492235	0.501517			Ctrl-ZnSO4-10	gga-miR-460a-5p	1.2337	0.2133	-2.53204	0.00994591	**		ZnSO4-10-ZnO_NP-5	gga-miR-6542-3p	81.6968	70.159	-0.219651	0.00484297
Ctrl-ZnO_NP-5	gga-miR-6564-3p	2.5795	1.9362	-0.413863	0.374997			Ctrl-ZnSO4-10	gga-miR-489-3p	10.3179	13.4384	0.381212	0.0536243			ZnSO4-10-ZnO_NP-5	gga-miR-6543-5p	1.2798	1.1389	-0.168277	0.797481
Ctrl-ZnO_NP-5	gga-miR-6586-5p	4.2617	3.189	-0.418325	0.246384			Ctrl-ZnSO4-10	gga-miR-490-3p	0.01	1.2798	6.99977	0.000337082	**		ZnSO4-10-ZnO_NP-5	gga-miR-6547-5p	2.3464	1.7084	-0.457803	0.35077
Ctrl-ZnO_NP-5	gga-miR-6604-5p	1.1215	1.7084	0.607216	0.307782			Ctrl-ZnSO4-10	gga-miR-499-5p	8.7478	5.7593	-0.603027	0.0175439			ZnSO4-10-ZnO_NP-5	gga-miR-6548-3p	2.453	2.0501	-0.258853	0.57748
Ctrl-ZnO_NP-5	gga-miR-6606-5p	11.888	15.9452	0.423616	0.0221827			Ctrl-ZnSO4-10	gga-miR-6516-5p	4.486	3.093	-0.536423	0.126885			ZnSO4-10-ZnO_NP-5	gga-miR-6550-3p	3.5196	5.1253	0.542225	0.100252
Ctrl-ZnO_NP-5	gga-miR-6608-3p	7.5141	9.681	0.365556	0.12077			Ctrl-ZnSO4-10	gga-miR-6542-3p	72.6739	81.6968	0.168842	0.028245			ZnSO4-10-ZnO_NP-5	gga-miR-6564-3p	3.4129	1.9362	-0.81777	0.0570881
Ctrl-ZnO_NP-5	gga-miR-6615-5p	3.701	3.8724	0.0653129	0.853266			Ctrl-ZnSO4-10	gga-miR-6543-5p	2.0187	1.2798	-0.657508	0.222979			ZnSO4-10-ZnO_NP-5	gga-miR-6583-5p	1.1732	0.1139	-3.36461	0.00489464	**
Ctrl-ZnO_NP-5	gga-miR-6625-5p	1.458	1.9362	0.409237	0.446878			Ctrl-ZnSO4-10	gga-miR-6547-5p	2.0187	2.3464	0.217022	0.643973			ZnSO4-10-ZnO_NP-5	gga-miR-6586-5p	5.866	3.189	-0.879273	0.00757848
Ctrl-ZnO_NP-5	gga-miR-6631-5p	1.1215	0.5695	-0.977662	0.221642			Ctrl-ZnSO4-10	gga-miR-6548-3p	1.9066	2.453	0.363545	0.438223			ZnSO4-10-ZnO_NP-5	gga-miR-6594-5p	1.1732	0.6834	-0.779647	0.298332
Ctrl-ZnO_NP-5	gga-miR-6633-5p	6.1683	7.2892	0.240888	0.364925			Ctrl-ZnSO4-10	gga-miR-6550-3p	4.9346	3.5196	-0.487522	0.141952			ZnSO4-10-ZnO_NP-5	gga-miR-6602-5p	1.2798	0.2278	-2.49008	0.0106142	*
Ctrl-ZnO_NP-5	gga-miR-6645-5p	19.8507	16.7425	-0.245675	0.127056			Ctrl-ZnSO4-10	gga-miR-6556-5p	1.1215	0.5333	-1.07241	0.175547			ZnSO4-10-ZnO_NP-5	gga-miR-6604-5p	0.7466	1.7084	1.19424	0.0662376
Ctrl-ZnO_NP-5	gga-miR-6648-3p	8.2992	8.8838	0.0982046	0.675381			Ctrl-ZnSO4-10	gga-miR-6564-3p	2.5795	3.4129	0.403907	0.310094			ZnSO4-10-ZnO_NP-5	gga-miR-6606-5p	8.1057	15.9452	0.976114	1.19462e-06
Ctrl-ZnO_NP-5	gga-miR-6652-5p	2.0187	1.0251	-0.977662	0.0949652			Ctrl-ZnSO4-10	gga-miR-6583-5p	0.1122	1.1732	3.3863	0.00450435	**		ZnSO4-10-ZnO_NP-5	gga-miR-6608-3p	7.8924	9.681	0.294692	0.19863
Ctrl-ZnO_NP-5	gga-miR-6656-5p	10.8787	11.5033	0.0805416	0.694779			Ctrl-ZnSO4-10	gga-miR-6586-5p	4.2617	5.866	0.460948	0.130243			ZnSO4-10-ZnO_NP-5	gga-miR-6615-5p	1.5998	3.8724	1.27534	0.00320784	**
Ctrl-ZnO_NP-5	gga-miR-6657-3p	1.2337	0.9112	-0.437152	0.525937			Ctrl-ZnSO4-10	gga-miR-6594-5p	0.1122	1.1732	3.3863	0.00450435	**		ZnSO4-10-ZnO_NP-5	gga-miR-6625-5p	3.7329	1.9362	-0.947069	0.0240981
Ctrl-ZnO_NP-5	gga-miR-6660-3p	1.2337	1.0251	-0.267227	0.689763			Ctrl-ZnSO4-10	gga-miR-6602-5p	0.4486	1.2798	1.51242	0.0621562			ZnSO4-10-ZnO_NP-5	gga-miR-6633-5p	5.4393	7.2892	0.422339	0.118382
Ctrl-ZnO_NP-5	gga-miR-6669-5p	5.0468	9.5671	0.922713	0.00041207			Ctrl-ZnSO4-10	gga-miR-6604-5p	1.1215	0.7466	-0.587022	0.416161			ZnSO4-10-ZnO_NP-5	gga-miR-6645-5p	30.0764	16.7425	-0.845117	3.87554e-09
Ctrl-ZnO_NP-5	gga-miR-6675-3p	1.6823	1.3667	-0.299738	0.599877			Ctrl-ZnSO4-10	gga-miR-6606-5p	11.888	8.1057	-0.552497	0.0104251			ZnSO4-10-ZnO_NP-5	gga-miR-6648-3p	6.5059	8.8838	0.449428	0.0677635
Ctrl-ZnO_NP-5	gga-miR-6682-3p	1.458	0.5695	-1.35622	0.0685076			Ctrl-ZnSO4-10	gga-miR-6608-3p	7.5141	7.8924	0.0708638	0.773865			ZnSO4-10-ZnO_NP-5	gga-miR-6652-5p	2.5597	1.0251	-1.32021	0.0154745	*
Ctrl-ZnO_NP-5	gga-miR-6689-3p	3.2524	1.4806	-1.13532	0.0157653	*		Ctrl-ZnSO4-10	gga-miR-6615-5p	3.701	1.5998	-1.21002	0.00557	**		ZnSO4-10-ZnO_NP-5	gga-miR-6656-5p	16.1047	11.5033	-0.485434	0.00848988
Ctrl-ZnO_NP-5	gga-miR-6698-3p	10.43	7.2892	-0.516907	0.0267175			Ctrl-ZnSO4-10	gga-miR-6625-5p	1.458	3.7329	1.35631	0.00252291	**		ZnSO4-10-ZnO_NP-5	gga-miR-6657-3p	2.773	0.9112	-1.60561	0.00352244	**
Ctrl-ZnO_NP-5	gga-miR-6702-5p	1.0094	1.4806	0.552684	0.384161			Ctrl-ZnSO4-10	gga-miR-6631-5p	1.1215	0.7466	-0.587022	0.416161			ZnSO4-10-ZnO_NP-5	gga-miR-6660-3p	1.8131	1.0251	-0.822694	0.169044
Ctrl-ZnO_NP-5	gga-miR-6705-5p	51.9259	48.2912	-0.104694	0.280593			Ctrl-ZnSO4-10	gga-miR-6633-5p	6.1683	5.4393	-0.181452	0.517657			ZnSO4-10-ZnO_NP-5	gga-miR-6669-5p	13.1184	9.5671	-0.455438	0.0251856
Ctrl-ZnO_NP-5	gga-miR-7441-5p	3.701	7.1754	0.955144	0.00166641			Ctrl-ZnSO4-10	gga-miR-6645-5p	19.8507	30.0764	0.599442	1.18783e-05			ZnSO4-10-ZnO_NP-5	gga-miR-6675-3p	0.7466	1.3667	0.872289	0.205169
Ctrl-ZnO_NP-5	gga-miR-7449-3p	1.2337	0.7973	-0.629797	0.377347			Ctrl-ZnSO4-10	gga-miR-6648-3p	8.2992	6.5059	-0.351224	0.159036			ZnSO4-10-ZnO_NP-5	gga-miR-6689-3p	1.7065	1.4806	-0.204858	0.714808
Ctrl-ZnO_NP-5	gga-miR-7455-3p	13.4581	24.1456	0.843286	1.85591e-07			Ctrl-ZnSO4-10	gga-miR-6652-5p	2.0187	2.5597	0.342548	0.453724			ZnSO4-10-ZnO_NP-5	gga-miR-6698-3p	11.5186	7.2892	-0.660133	0.0033659
Ctrl-ZnO_NP-5	gga-miR-7b	1.7944	1.7084	-0.0708557	0.894713			Ctrl-ZnSO4-10	gga-miR-6656-5p	10.8787	16.1047	0.565976	0.00237029			ZnSO4-10-ZnO_NP-5	gga-miR-6702-5p	1.2798	1.4806	0.210264	0.715454
Ctrl-ZnO_NP-5	gga-miR-92-3p	2121.11	3816.49	0.847425	0			Ctrl-ZnSO4-10	gga-miR-6657-3p	1.2337	2.773	1.16846	0.0210358	*		ZnSO4-10-ZnO_NP-5	gga-miR-6705-5p	49.274	48.2912	-0.0290663	0.765751
Ctrl-ZnO_NP-5	gga-miR-92-5p	12.3366	12.5284	0.0222573	0.908614			Ctrl-ZnSO4-10	gga-miR-6660-3p	1.2337	1.8131	0.555467	0.327649			ZnSO4-10-ZnO_NP-5	gga-miR-7441-5p	10.0255	7.1754	-0.482543	0.0392988
Ctrl-ZnO_NP-5	gga-miR-9-5p	0.7851	12.5284	3.99618	1.50978e-25	**		Ctrl-ZnSO4-10	gga-miR-6669-5p	5.0468	13.1184	1.37815	6.96155e-09	**		ZnSO4-10-ZnO_NP-5	gga-miR-7449-3p	1.5998	0.7973	-1.0047	0.128106
Ctrl-ZnO_NP-5	gga-miR-99a-3p	3.3645	4.5558	0.437312	0.210408			Ctrl-ZnSO4-10	gga-miR-6675-3p	1.6823	0.7466	-1.17203	0.071901			ZnSO4-10-ZnO_NP-5	gga-miR-7455-3p	30.183	24.1456	-0.321976	0.0137878
Ctrl-ZnO_NP-5	gga-miR-99a-5p	308.191	313.779	0.0259245	0.505045			Ctrl-ZnSO4-10	gga-miR-6682-3p	1.458	0.8532	-0.773035	0.235986			ZnSO4-10-ZnO_NP-5	gga-miR-7472-5p	1.0665	0.6834	-0.642082	0.404969
								Ctrl-ZnSO4-10	gga-miR-6689-3p	3.2524	1.7065	-0.930464	0.0360347			ZnSO4-10-ZnO_NP-5	gga-miR-7b	1.8131	1.7084	-0.0858127	0.874969
								Ctrl-ZnSO4-10	gga-miR-6698-3p	10.43	11.5186	0.143226	0.485127			ZnSO4-10-ZnO_NP-5	gga-miR-92-3p	2156.01	3816.49	0.823885	0
								Ctrl-ZnSO4-10	gga-miR-6702-5p	1.0094	1.2798	0.34242	0.603751			ZnSO4-10-ZnO_NP-5	gga-miR-92-5p	15.2515	12.5284	-0.283749	0.121169
								Ctrl-ZnSO4-10	gga-miR-6705-5p	51.9259	49.274	-0.0756277	0.425028			ZnSO4-10-ZnO_NP-5	gga-miR-9-5p	31.3562	12.5284	-1.32355	4.59535e-18	**
								Ctrl-ZnSO4-10	gga-miR-7441-5p	3.701	10.0255	1.43769	1.78363e-07	**		ZnSO4-10-ZnO_NP-5	gga-miR-99a-3p	4.0528	4.5558	0.168785	0.604737
								Ctrl-ZnSO4-10	gga-miR-7449-3p	1.2337	1.5998	0.3749	0.523997			ZnSO4-10-ZnO_NP-5	gga-miR-99a-5p	357.61	313.779	-0.188637	3.52634e-07
								Ctrl-ZnSO4-10	gga-miR-7455-3p	13.4581	30.183	1.16526	1.10061e-14	**
								Ctrl-ZnSO4-10	gga-miR-7472-5p	0.6729	1.0665	0.66442	0.387114
								Ctrl-ZnSO4-10	gga-miR-7b	1.7944	1.8131	0.014957	0.98126
								Ctrl-ZnSO4-10	gga-miR-92-3p	2121.11	2156.01	0.0235391	0.106793
								Ctrl-ZnSO4-10	gga-miR-92-5p	12.3366	15.2515	0.306006	0.0943965
								Ctrl-ZnSO4-10	gga-miR-9-5p	0.7851	31.3562	5.31973	1.34833e-74	**
								Ctrl-ZnSO4-10	gga-miR-99a-3p	3.3645	4.0528	0.268527	0.450985
								Ctrl-ZnSO4-10	gga-miR-99a-5p	308.191	357.61	0.214562	7.02794e-09
